# Supplementary material for: Gallium(iii) xanthate as a novel thermal latent curing agent for an epoxy resin composite
Source: Royal Society of Chemistry journal article supplement (doi:10.1039/c4ra03151b), 2014-01-01
Supplement: c4ra03151b1.pdf [file c4ra03151b1.pdf]

# **RSC Advances**

## **Communication**

### **Electronic Supplementary Information**

#### **Gallium (III) xanthate as a novel thermal latent curing agent for epoxy resin composite**

Tarun Chand Vagvala\*, Shyam Sudhir Pandey, Yuhei Ogomi, Shuzi Hayase\*

Department of Biological Functions and Systems  
Graduate School of Life Science and Systems Engineering,  
Kyushu Institute of Technology,  
2-4 Hibikino, Wakamatsu-ku, Kitakyushu 808-0196, Japan  
Email: tarunchandv@gmail.com, hayase@life.kyutech.ac.jp

| <b>S. No.</b> | <b>Contents</b>                                                                                                                                 | <b>Page No.</b> |
|---------------|-------------------------------------------------------------------------------------------------------------------------------------------------|-----------------|
| 1             | General information                                                                                                                             | 3               |
| 2             | <b>Figure S1:</b> <sup>1</sup> H NMR Gallium (III) xanthate                                                                                     | 4               |
| 3             | <b>Figure S2:</b> <sup>13</sup> C NMR Gallium (III) xanthate                                                                                    | 5               |
| 4             | <b>Figure S3:</b> HPLC Gallium (III) xanthate                                                                                                   | 6               |
| 5             | Figure S4: FTIR Spectrum of Ga (III) xanthate                                                                                                   | 6               |
| 6             | <b>Figure S5:</b> Electronic absorption spectra of epoxy composite consisting of Ga (III) xanthate baked at 120 °C (0% and 5% catalyst content) | 7               |
| 7             | <b>Figure S6:</b> Tauc plot of gallium sulphide epoxy resin composite to determine the optical band gap.                                        | 7               |
| 8             | <b>Figure S7:</b> Shelf life study                                                                                                              | 8               |
| 9             | <b>Table 1:</b> Curing time at 200 °C conducted at different time intervals after storage at room temperature (2.5% catalyst content)           | 8               |
| 10            | <b>Appendix 1:</b> Details of calculation of energy of activation by DSC analysis                                                               | 9               |
| 11            | <b>Table 2:</b> Exothermic peak temperature at different heating rates for epoxy resin in the presence of 5 % catalyst.                         | 10              |
| 12            | <b>Figure S8:</b> Confirmation of curing of epoxy resin by gallium xanthate precursor by DSC analysis.                                          | 10              |
| 13            | <b>Figure S9:</b> EPMA analysis of Ga (III) xanthate after annealing at 200°C                                                                   | 11              |
| 14            | <b>Figure S10:</b> EDAX analysis of thermolysis product of Ga (III) xanthate precursor in the epoxy resin.                                      | 11              |
| 15            | References                                                                                                                                      | 12              |

## 1. General information:

Anhydrous gallium (III) chloride purchased from Tokyo Chemical Corporation, Japan. Potassium *tert* butoxide and carbon disulphide purchased from Wako Japan and 2, 2 - dimethyl-3-pentanol was purchased from Sigma Aldrich, Japan. Commercially available UCAT3512T supplied by Kyocera Company, Japan.  $^1\text{H}$  NMR spectrum was recorded at 26  $^{\circ}\text{C}$  on JEOL JNM-A500 Nuclear Magnetic Resonance Spectrometer operated at 500 MHz.  $^{13}\text{C}$  NMR spectrum was also recorded at 24  $^{\circ}\text{C}$  on JEOL Nuclear Magnetic Resonance Spectrometer at 125 MHz. NMR spectra were measured in  $\text{CDCl}_3$  solution with internal reference TMS. All  $^1\text{H}$  shifts are given in parts per millions (s = singlet; d = doublet; t = triplet; m = multiplet). High performance liquid chromatography (HPLC) was performed using JASCO Corporation system. The IR spectrum was recorded on a JASCO FT/IR 4100. Elemental analysis performed using Yanaco MT-5. Curing time of the epoxy resin at various temperatures was studied using Panasonic KT4 temperature controller. Electronic absorption spectra were recorded using JASCO V-670 spectrophotometer. Differential thermal analysis studied using DSC-60 Differential scanning calorimeter, Shimadzu. Thermogravimetric analysis studied using DTG-60 simultaneous DTA-TG apparatus, Shimadzu. JEOL JXA-8530F Field Emission Electron Probe Microanalyser for electron probe microanalysis.

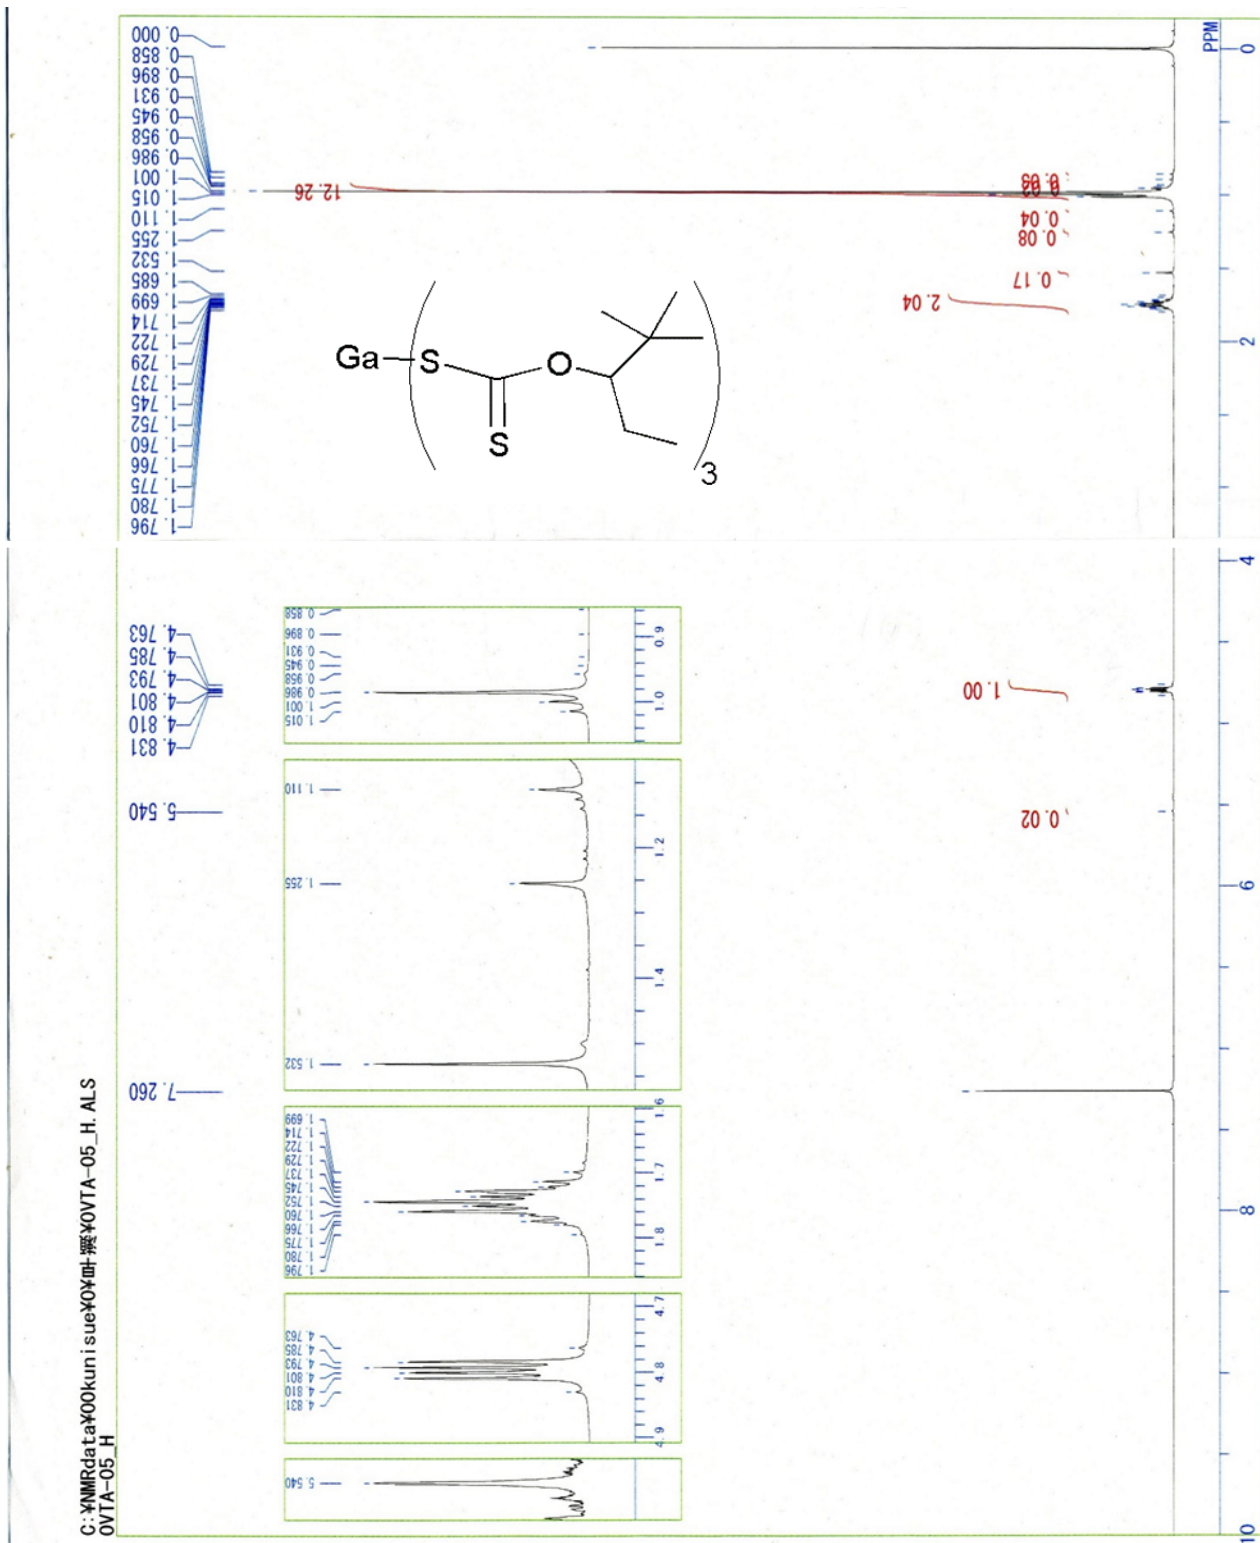

Figure S1: <sup>1</sup>H NMR Gallium (III) xanthate, CDCl<sub>3</sub>, 26 °C, 500 MHz.

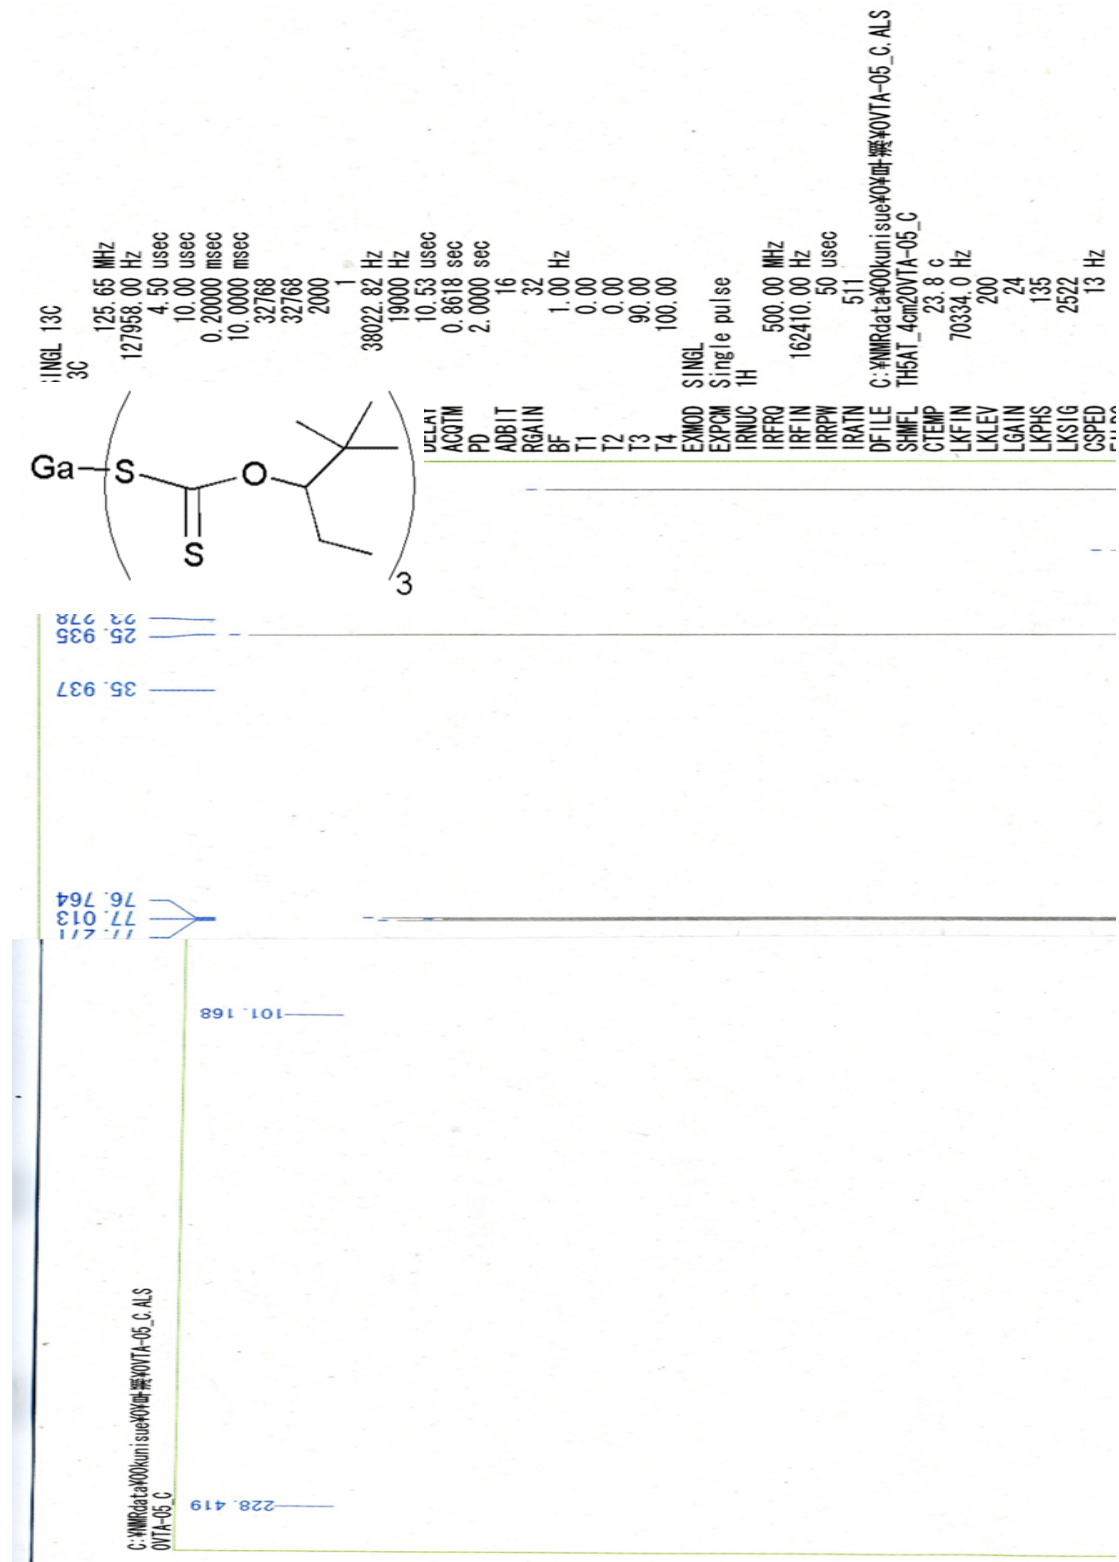

**Figure S2:**  $^{13}\text{C}$  NMR Gallium (III) xanthate,  $\text{CDCl}_3$ ,  $24^\circ\text{C}$ , 125 MHz.

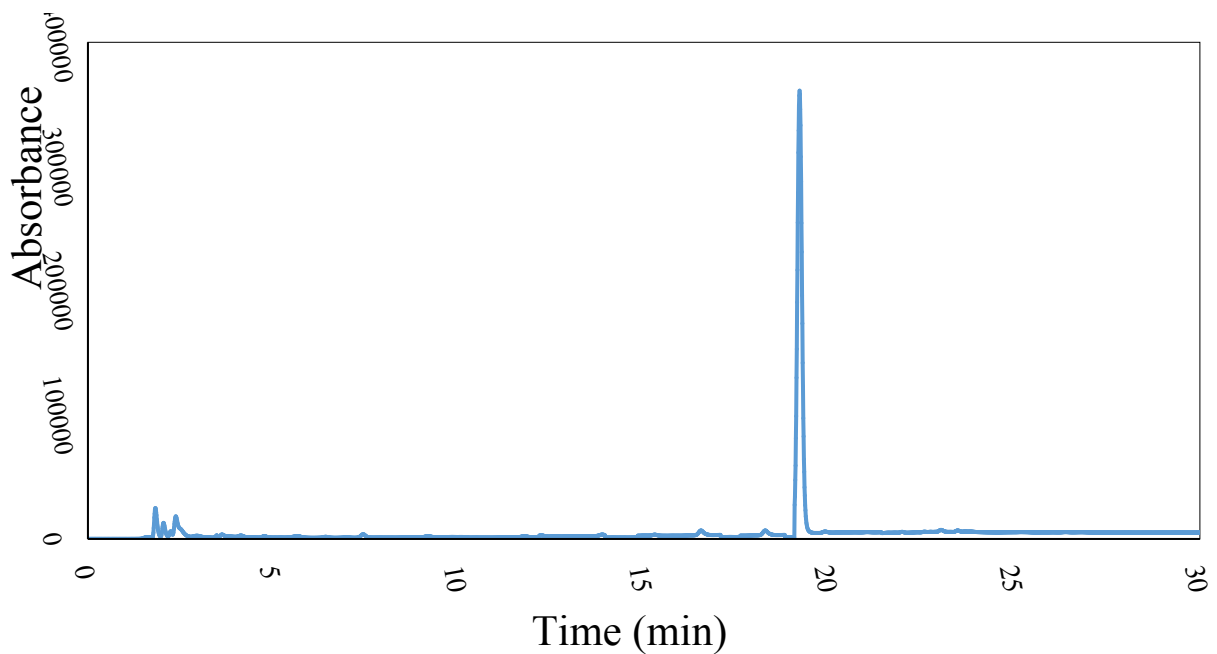

**Figure S3:** HPLC of Gallium (III) xanthate. Gradient System: A= 70% to 100%, A - Methanol, B - Distilled Water, Flow rate: 1 ml / min, Elution time: 30 min.

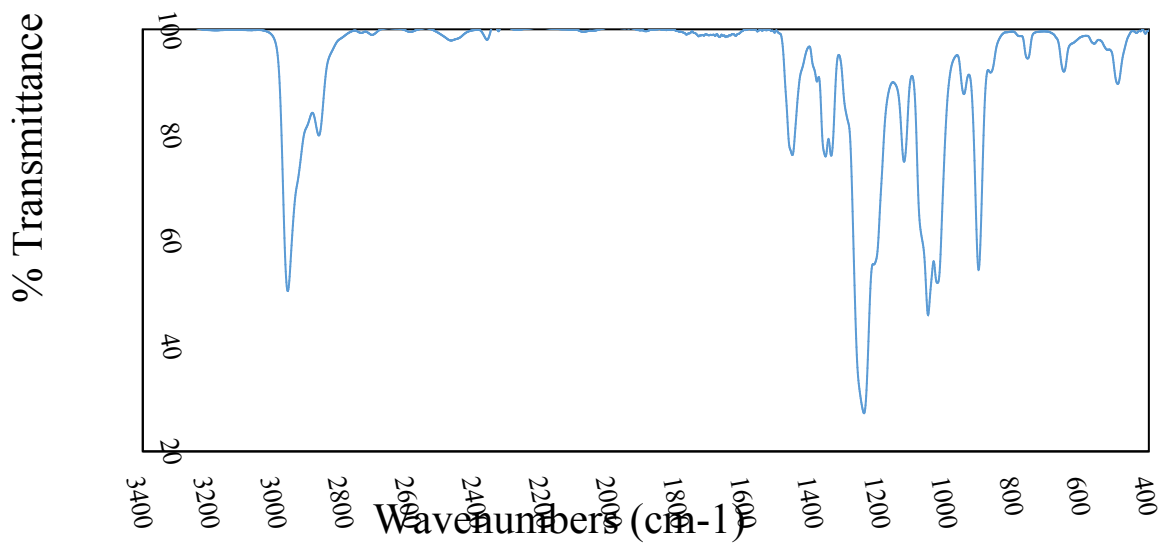

**Figure S4:** FTIR spectrum of Ga (III) xanthate.



**1:1 Epoxy resin/phenol composite consisting of 2.5% UCAT3512T.**

To a 2 g mixture of 1:1 molar ratio of epoxy resin (CNE200ELB65) and phenol (BRG556) 0.5 g of UCAT3512T was added and grinded thoroughly and transferred into a glass bottle and stored under vacuum.

**1:1 Epoxy resin/phenol composite consisting of 2.5% Ga (III) xanthate.**

To a 2 g mixture of 1:1 molar ratio of epoxy resin (CNE200ELB65) and phenol (BRG556) 0.5 g of Ga (III) xanthate was added and grinded thoroughly and transferred into a glass bottle and stored under vacuum.

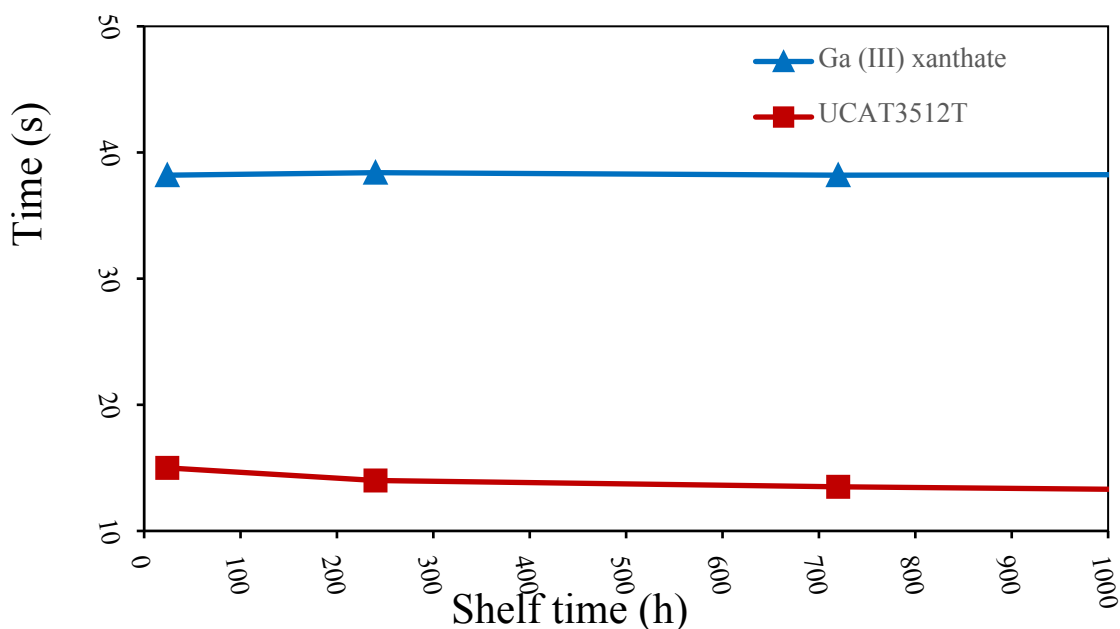

**Figure S7:** Curing time of epoxy resin composite conducted at 200 °C after storage at room temperature for different time intervals (2.5% catalyst content).

**Table 1: Curing time at 200 °C after storage at room temperature**

| Shelf life time (h) | Curing time (s) with 2.5% standard catalyst at 200 °C | Curing time (s) with 2.5% Ga (III) xanthate at 200 °C |
|---------------------|-------------------------------------------------------|-------------------------------------------------------|
| 24                  | 14.5                                                  | 38.2                                                  |
| 240                 | 14.0                                                  | 38.4                                                  |
| 720                 | 13.5                                                  | 38.2                                                  |
| 1440                | 13                                                    | 38.3                                                  |
| 2160                | 12.3                                                  | 38.2                                                  |
| 4320                | 12                                                    | 38.3                                                  |



## Appendix 1. Differential scanning calorimetric (DSC) measurements and calculation of Energy of activation

The curing thermal data were obtained by means of Shimadzu DSC-50 differential scanning Calorimeter. Pure Indium was taken as standard for calorimetric calibration. Runs were carried out using an empty cell as a reference. The non-isothermal DSC curves for 1:1 epoxy resin/phenol composite system including 5% catalyst were recorded at different heating rates ranging from 5-20 °C/min. The DSC cure of epoxy resin is characterized by a broad exothermic peak. The peak temperature,  $T_p$ , shifts to a higher temperature range with increasing heating rate. The non-isothermal isoconversional<sup>1</sup> Flynn–Wall<sup>2</sup>–Ozawa<sup>3</sup> method was applied to the dynamic heating experimental data obtained at different heating rates to derive activation energy.<sup>4</sup> The reaction rate equation utilized to study the resins curing kinetics can be expressed, in general, as<sup>5</sup>:

$$d\alpha/dt = kf(\alpha) \text{----- (1)}$$

where  $\alpha$  is degree of cure,  $t$  is time,  $k$  is the rate constant expressed by Arrhenius equation and is a function of temperature, and  $f(\alpha)$  is the reaction model. Considering a dynamic curing situation equation (1) including Arrhenius equation can be written as<sup>6</sup>

$$q \, d\alpha/dT = A \, e^{(-E/RT)} \, f(\alpha) \text{-----(2)}$$

Where  $q$  is the heating rate,  $T$  is the temperature,  $A$  is pre-exponential factor,  $E$  is activation energy,  $R$  is gas constant. An integral form of the rate equation can be now expressed as<sup>7</sup>:

$$g(\alpha) = AE/qR \, p(x) \text{-----(3)}$$

$$p(x) = \int_x^\alpha \frac{\exp(-x)}{x^2} \, dx \text{-----(4)}$$

Where  $g(\alpha)$  is

$$\int_0^\alpha \frac{d\alpha}{f(\alpha)}$$

is the

integrated form of the conversion dependent function and  $p(x)$  defined by equation 4 where  $x$  is defined as  $E/RT$ . Using Doyle's linear approximation<sup>7</sup> the Flynn-Wall-Ozawa method can be modified as

$$\log q = \log (AE/g(\alpha)R) - 2.315 - 0.457E/RT \text{-----(5)}$$

Based on assumption that the extent of reaction is constant and independent of the heating rate at exothermic peak temperature<sup>9,10</sup> the equation 5 can be rearranged as

$$\log q = A^* - 0.457E/RT_{\text{peak}} \text{----- (6)}$$

where  $A^* = \log (AE/g(\alpha)R)$  and is a constant. <sup>11</sup>The slope value obtained by the plot of inverse of peak temperatures ( $1000 / K$ ) of exotherms obtained at various heating rates as the horizontal axis and the common logarithm of the heating rate ( $K / \text{min}$ ) as the vertical axis (Arrhenius's plot) activation energy  $E$  can be determined since  $R$  (universal gas constant) is known.

**Table 2: Peak temperatures obtained from differential scanning calorimetric analysis curves for curing of epoxy composite at different heating rates.**

| Curing agent (5% by mass) | Heating rate ( °C / min) | Peak temperature ( °C) |
|---------------------------|--------------------------|------------------------|
| <b>Ga (III) xanthate</b>  | 5                        | 196.51                 |
|                           | 10                       | 206.55                 |
|                           | 15                       | 210.51                 |
|                           | 20                       | 220.17                 |
| <b>UCAT3512T</b>          | 5                        | 137.70                 |
|                           | 10                       | 151.17                 |
|                           | 15                       | 159.36                 |
|                           | 20                       | 166.49                 |

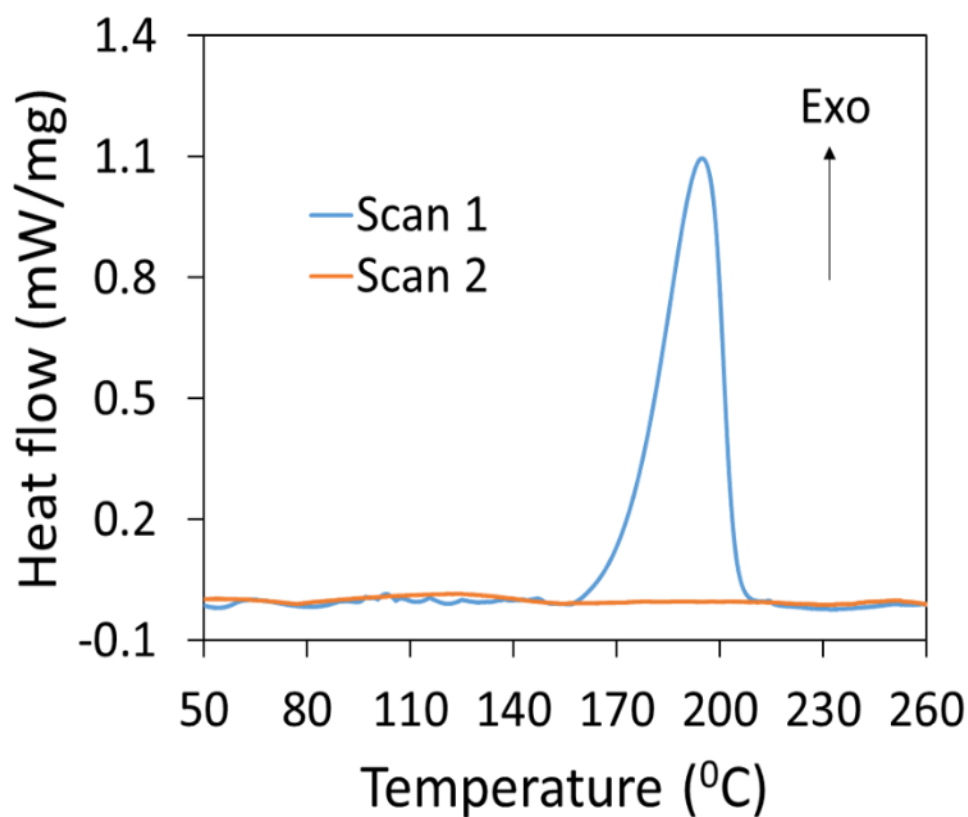

**Figure S8:** Differential scanning calorimetric analysis curves for curing of epoxy composite consisting of 5% Ga (III) xanthate at 10 °C/min heating rate. **Scan 1:** First scan from 30°C to 300 °C. **Scan 2:** A repeated scan from 30 to 300°C for the same sample used for first scan.

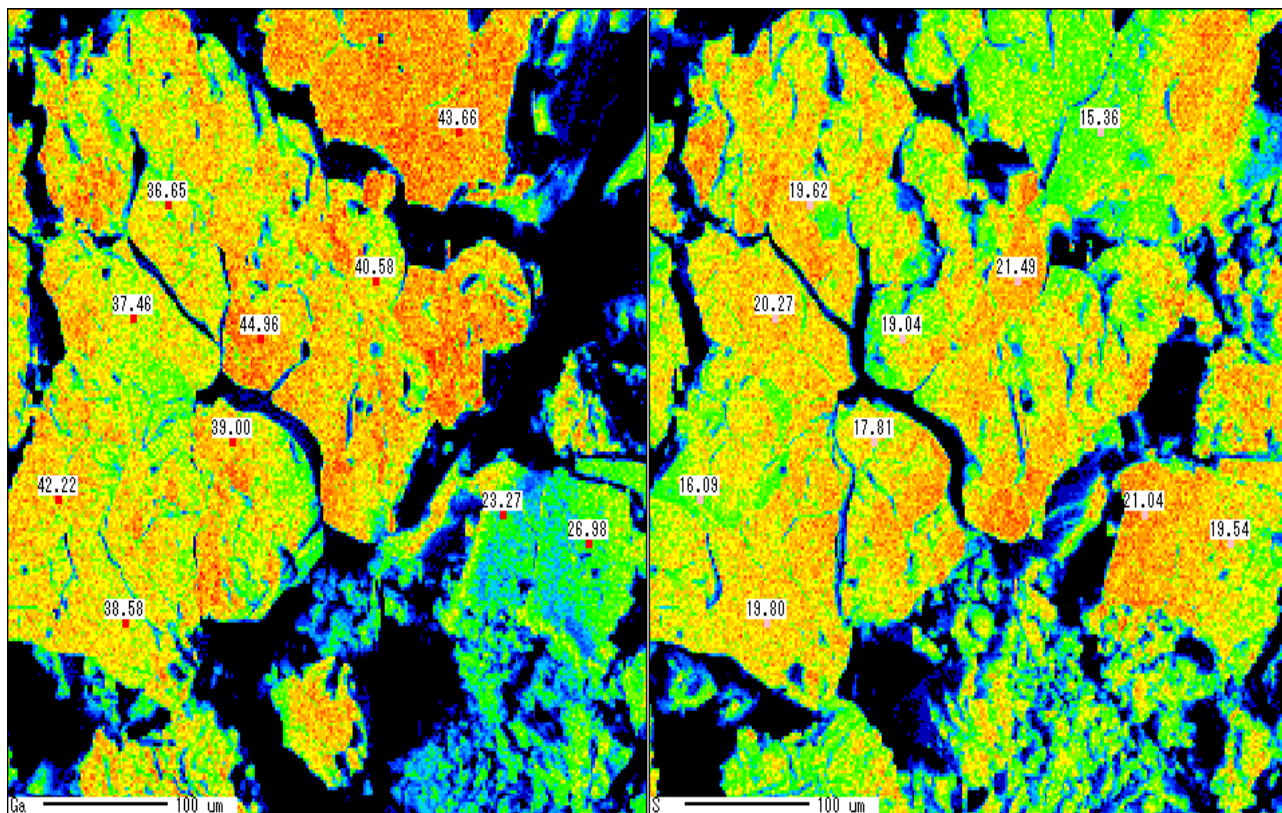

**Figure S9:** EPMA micrograph with elemental distribution mapping for Ga (III) xanthate after annealing at 200 °C. Left mapping for Ga while right mapping for S.

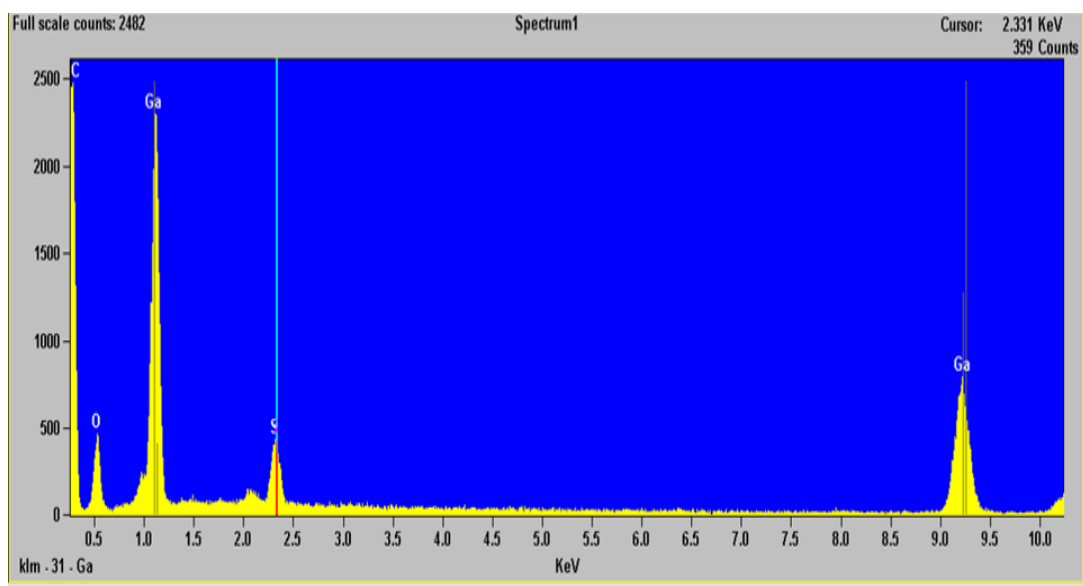

**Figure S10:** EDAX analysis for epoxy resin containing 5 % Ga (III) xanthate precursor after conducting the differential scanning calorimetric analysis indicating the presence of Ga and S after curing.

## 11. References

- <sup>1</sup> J. Zhang, Y. Wang, X. Wang, G. Ding, Y. Pan, H. Xie, Q. Chen and R. Cheng, *Journal Applied polymer science*, 2014, **131**, 40472.
- <sup>2</sup> J.H. Flynn and Leo A. Wall, *Journal of research of the national bureau of standards – A*, 1966, **70A(6)**, 1.
- <sup>3</sup> T. Ozawa, *Journal of Thermal Analysis*, 1970, **2**, 301.
- <sup>4</sup> J.C. Domínguez, J.C. Grivela and B. Madsena, *Thermochemical Acta*, 2012, **529**, 29.
- <sup>5</sup> M.V. Alonso, M. Oliet, J. García, F. Rodríguez and J. Echeverría, *Chemical Engineering Journal*, 2006, **122**, 159.
- <sup>6</sup> G. Francucci, F. Cardona and N. W. Manthey, *Journal Applied polymer science*, 2013, **128(3)**, 2030.
- <sup>7</sup> Z. Zhang, G. Liang, P. Ren, J. Wang and *Polymer Composites*, 2008, **29**, 77.
- <sup>8</sup> L. Barral, J. Cano, J. Lo'pez, I. Lo'pez-Bueno, P. Nogueira, M. J. Abad and C. Rami'Rez, *Journal of Polymer Science: Part B: Polymer Physics*, 2000, **38**, 351.
- <sup>9</sup> F. Mustata, N. Tudorachi and I. Bicu, *Composites: Part B*, 2013, **55**, 470.
- <sup>10</sup> T. Yang, C. Zhang, J. Zhanga and J. Cheng, *Thermochemical Acta*, 2014, **577**, 11.
- <sup>11</sup> I. Hamerton, W. Tang, J.V. Anguita, S. Ravia and P. Silva, *Reactive & Functional Polymers*, 2014, **74**, 1.
